# Supplementary material for: A mononuclear Dy(iii) complex incorporating the dithienylethene unit: crystalline-phase photochromism, magnetic and luminescent properties
Source: Royal Society of Chemistry journal article supplement (doi:10.1039/c4ra05312e), 2014-09-04
Supplement: c4ra05312e1.pdf [file c4ra05312e1.pdf]

## Electronic Supporting Information

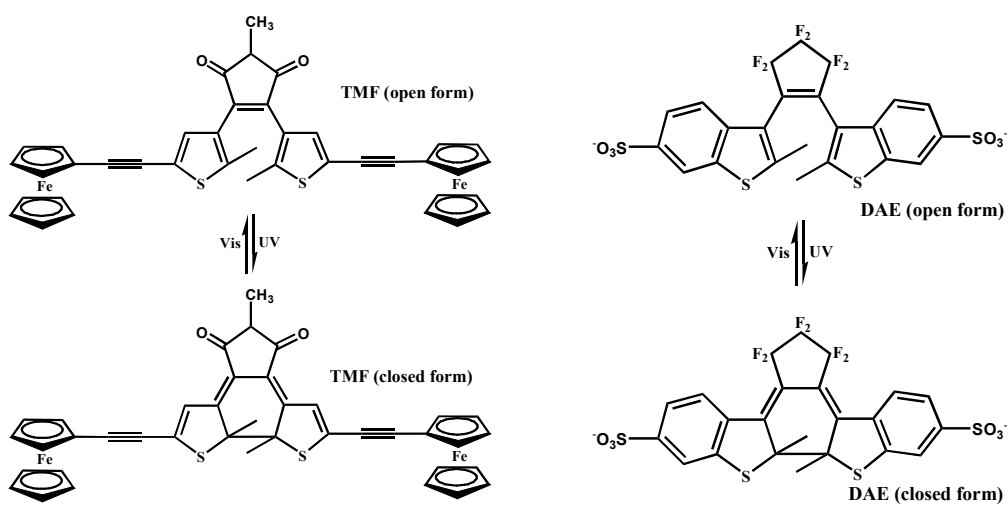

Scheme S1

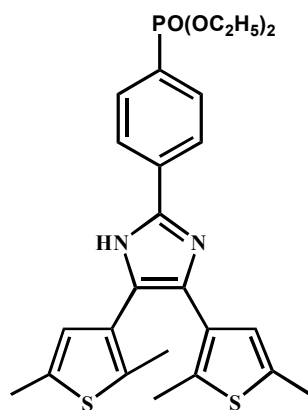

Scheme S2

**Table S1** Solid-state emission data of **1**, **1L**, and **dbi** at room temperature

| Compound   | $\lambda_{\text{max}}$ (nm) |
|------------|-----------------------------|
| <b>1</b>   | 423, 452, 484, 518, 570     |
| <b>1L</b>  | 437, 459, 482, 522, 565     |
| <b>dbi</b> | 423                         |

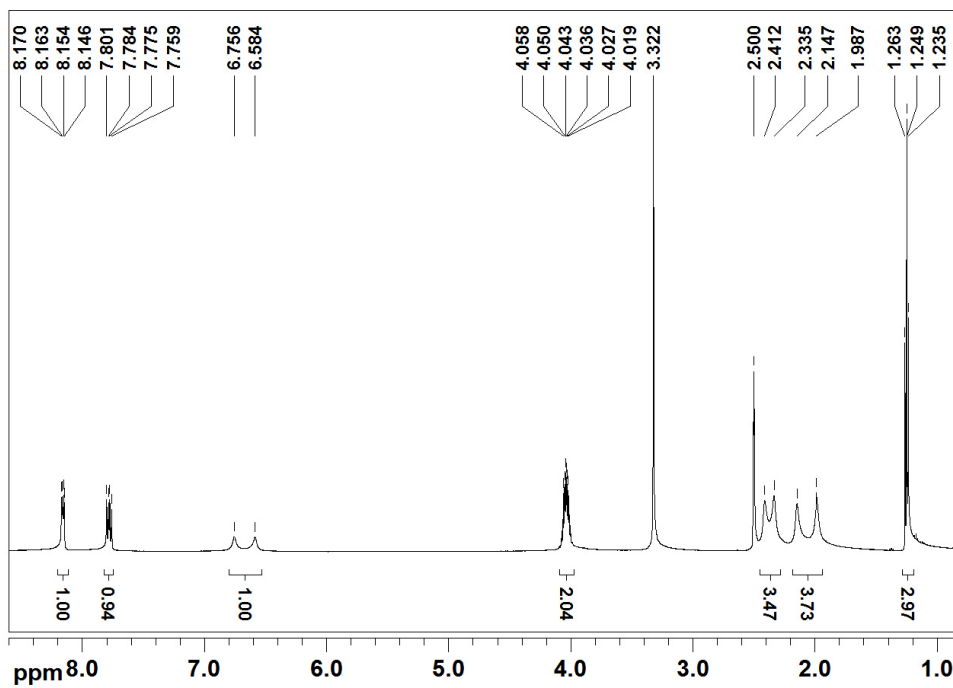

**Fig. S1**  $^1\text{H}$  NMR spectrum of dbi before irradiation with 365 nm light (500 MHz,  $\text{DMSO-}d_6$ ).

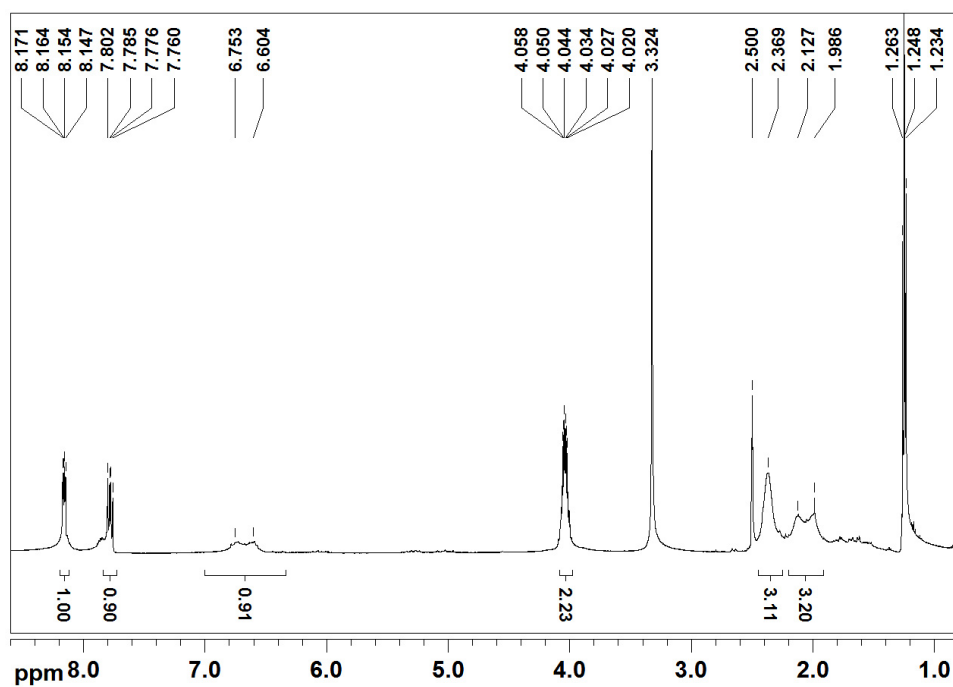

**Fig. S2**  $^1\text{H}$  NMR spectrum of dbi after irradiation with 365 nm light (500 MHz,  $\text{DMSO-}d_6$ ).

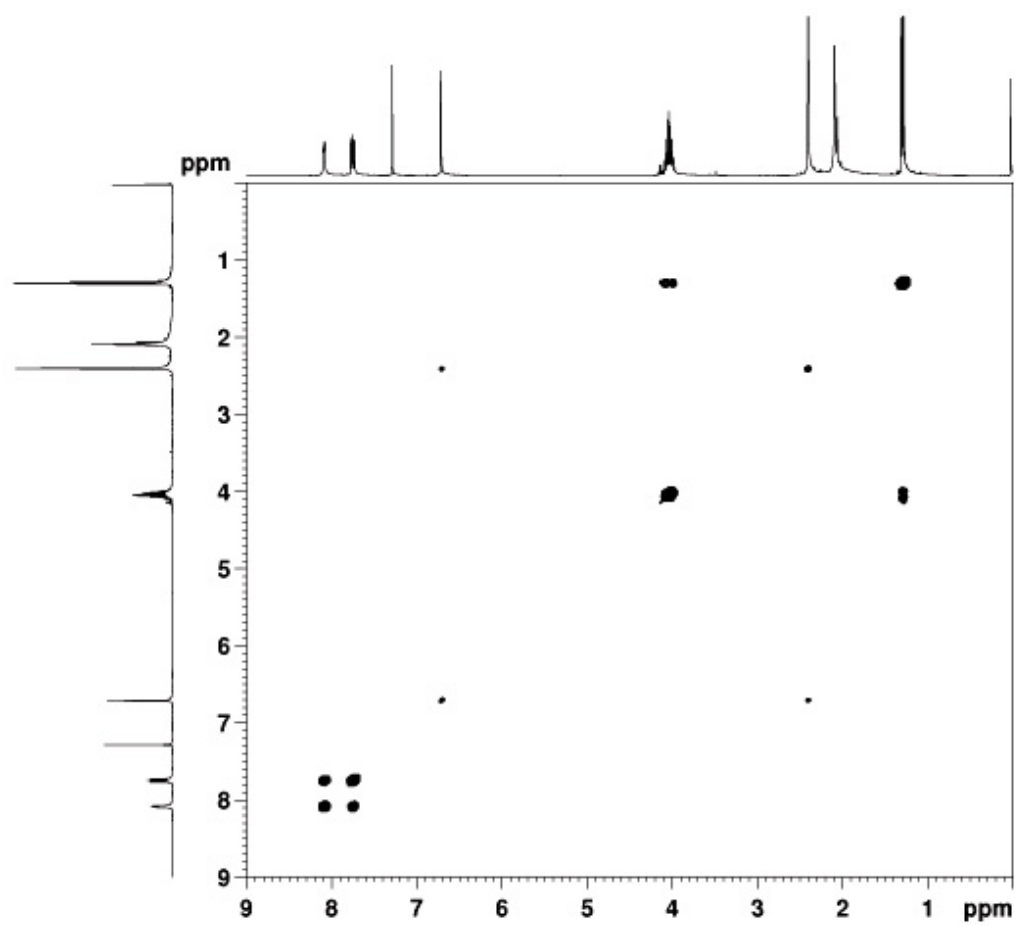

**Fig. S3** COSY NMR spectrum of dbi (500 MHz,  $\text{CDCl}_3$ ).

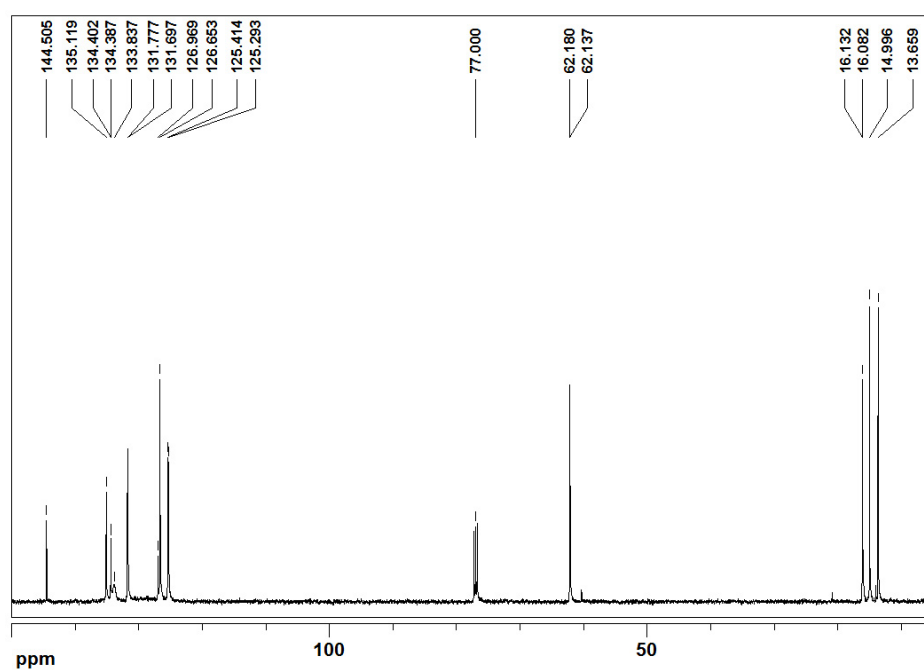

**Fig. S4**  $^{13}\text{C}$  NMR spectrum of dbi (500 MHz,  $\text{CDCl}_3$ ).

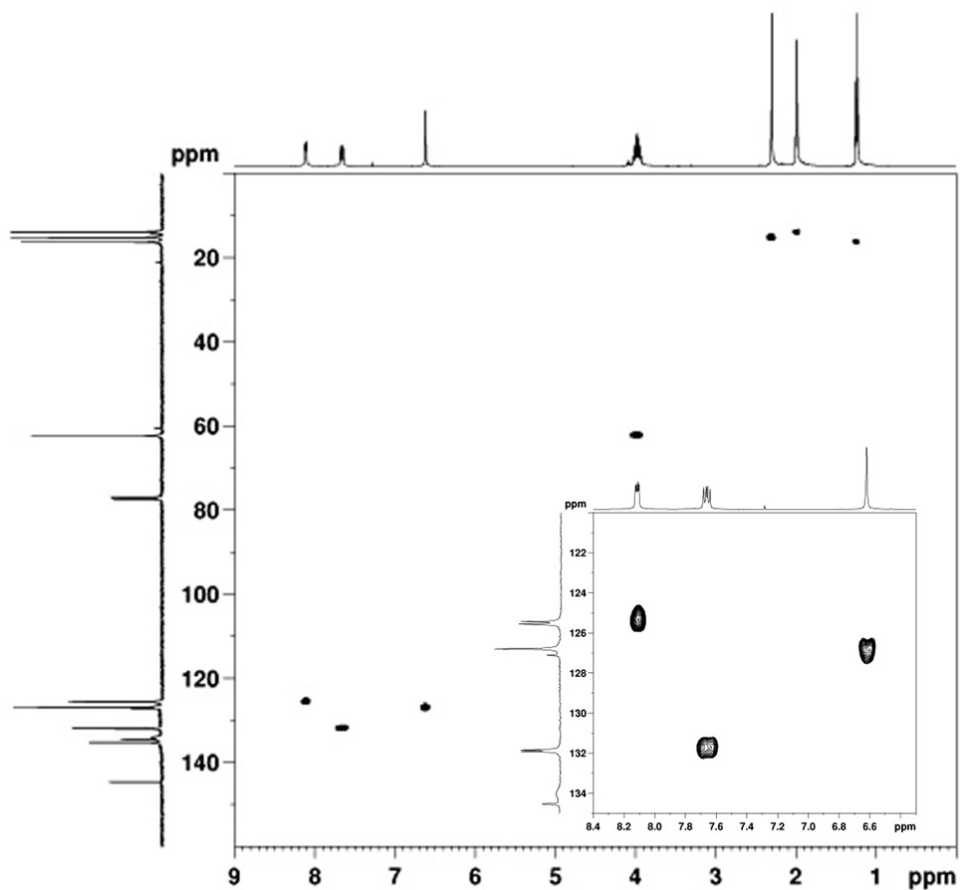

**Fig. S5** HSQC NMR spectrum of dbi (500 MHz,  $\text{CDCl}_3$ ). Inset:  $^{13}\text{C}$  signals in 120-135 ppm.

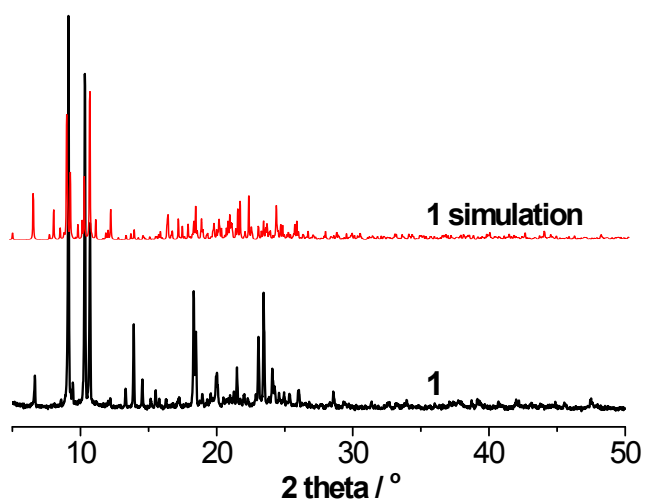

**Fig. S6** Experimental and simulated XRD patterns of **1**.

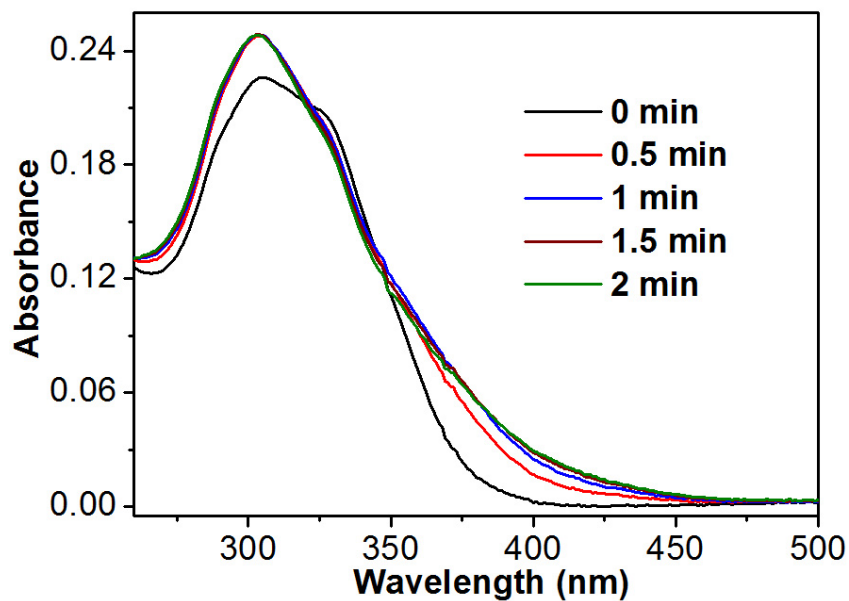

**Fig. S7** Absorption-spectra of **1** in CH<sub>3</sub>CN solution ( $c = 1.1 \times 10^{-5}$  M) upon UV irradiation ( $\lambda = 365$  nm) for 0 - 2 minutes.

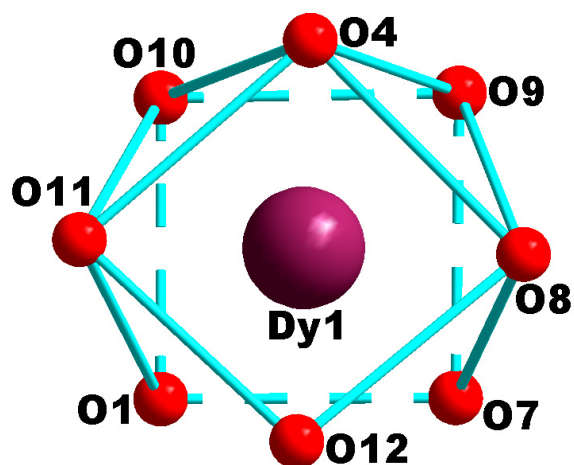

**Fig. S8** The coordination geometry of Dy(III) ion in **1**.

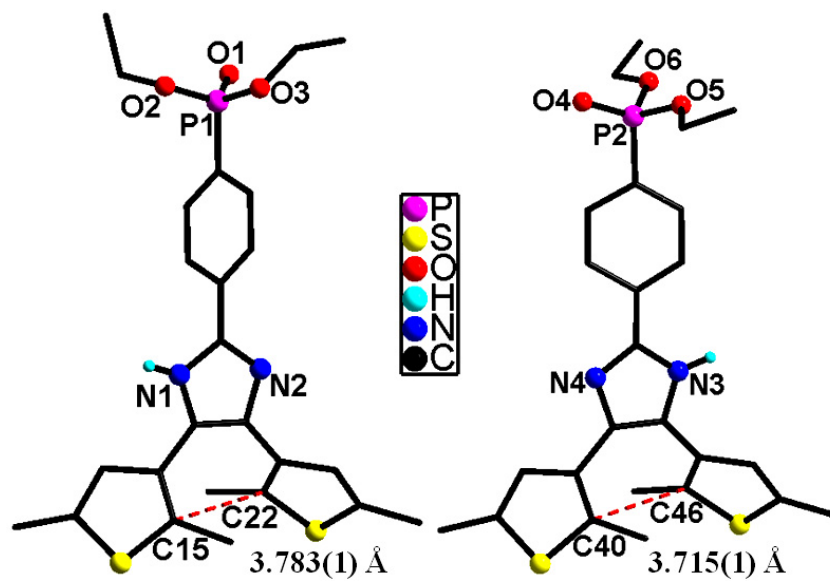

**Fig. S9** Antiparallel conformations of dbi ligands in **1**. All H atoms attached to C atoms are omitted for clarity.

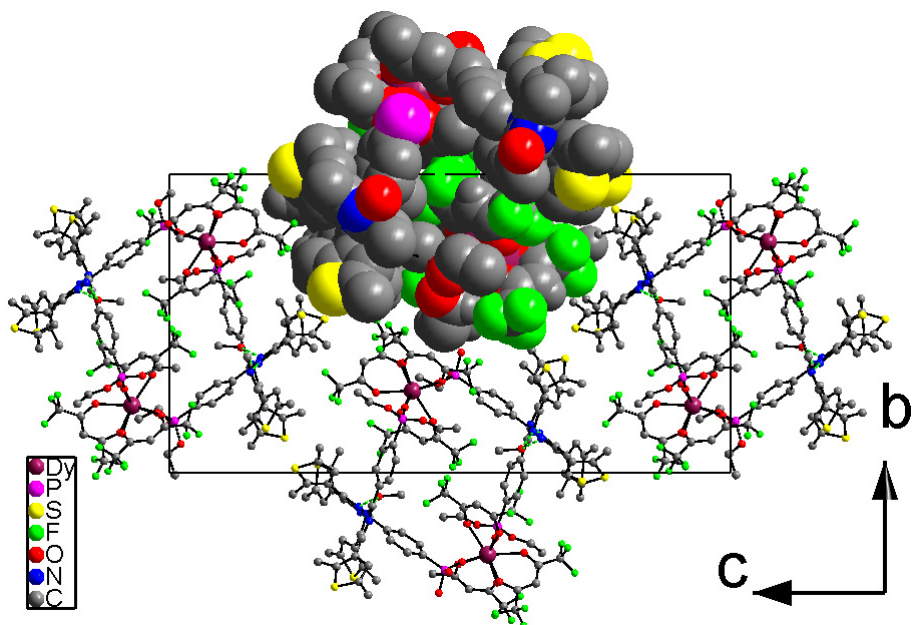

**Fig. S10** The packing structure of **1**.

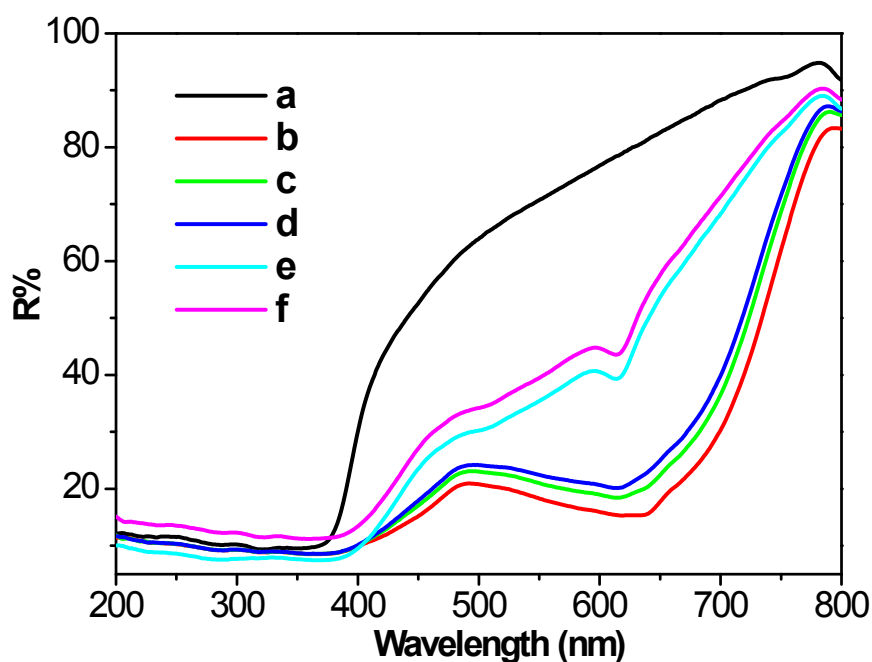

**Fig. S11** Plots a and b: irradiating ( $\lambda = 365$  nm) dbi for 0, 20 minutes, respectively; plots c and d: placing the sample corresponding to plot b in the dark for 15, 30 minutes, respectively; plots e and f: irradiating ( $\lambda = 580$  nm) the sample corresponding to plot b for 1 and 2 minutes, respectively.

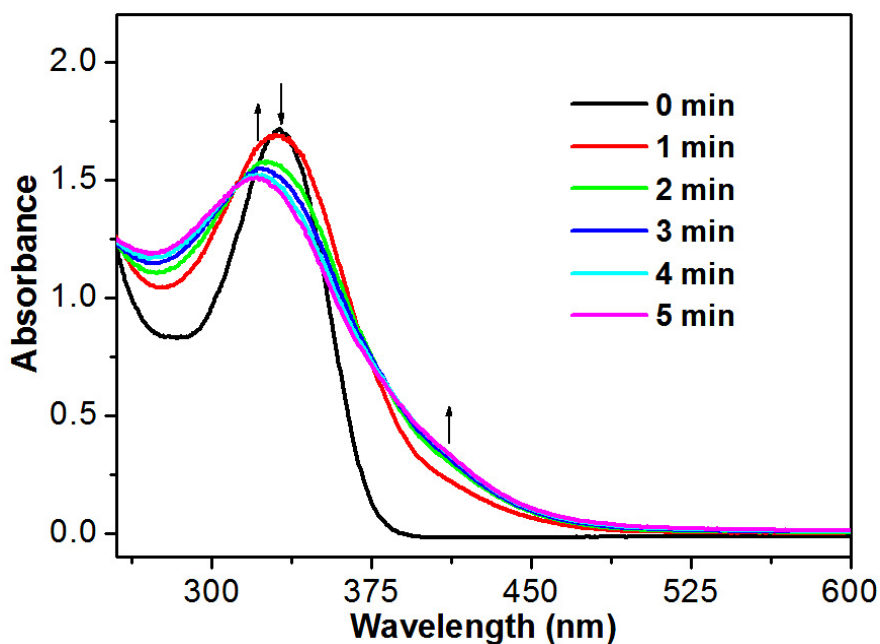

**Fig. S12** Absorption-spectra changes of dbi in  $\text{CH}_3\text{CN}$  solution ( $c = 2.0 \times 10^{-5}$  M) upon UV irradiation ( $\lambda = 365$  nm) for 0 - 5 minutes.

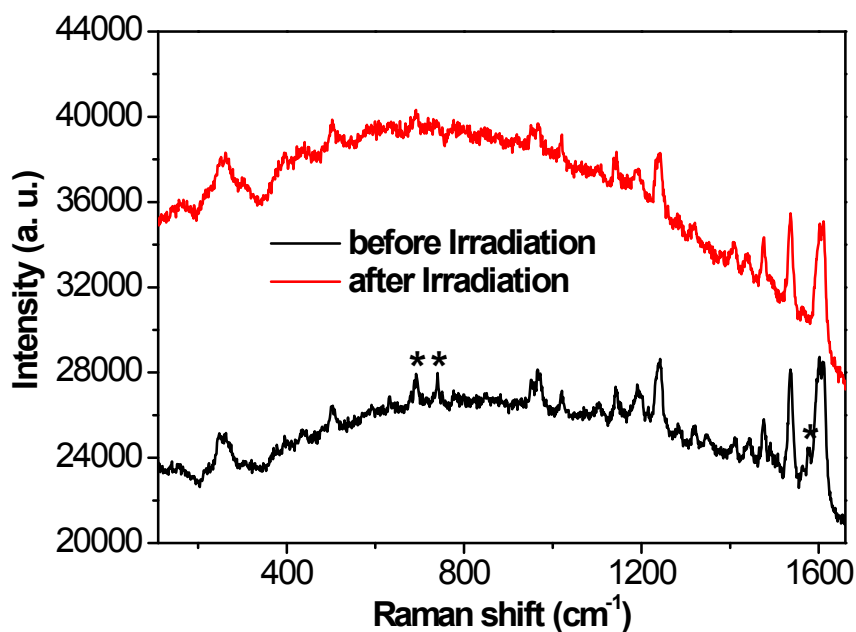

**Fig. S13** Raman spectra of **1** before and after irradiation ( $\lambda = 365$  nm, 20 minutes), using laser light of 785 nm. Three peaks with \* are at 691, 740 and 1575  $\text{cm}^{-1}$ , respectively.

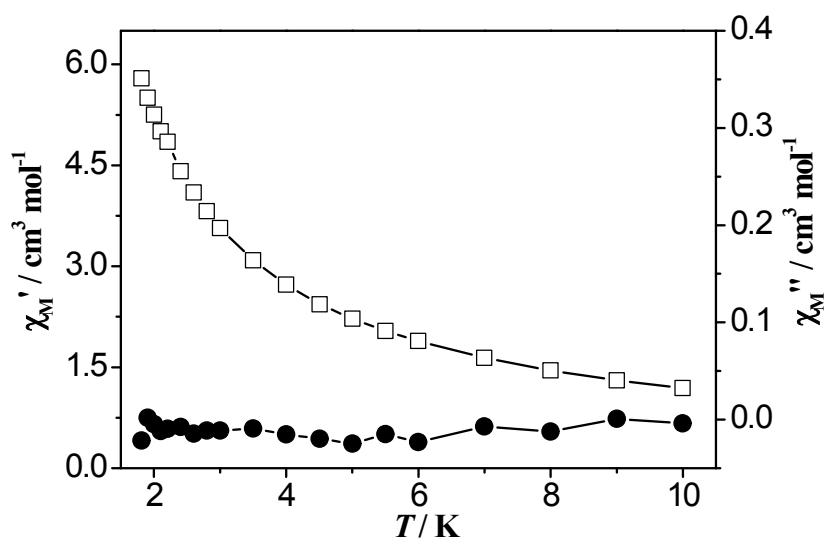

**Fig. S14** Temperature-dependent ac susceptibilities of in-phase  $\chi_M'$  and out-of-phase  $\chi_M''$  for **1** under zero static field with a frequency of 1488 Hz in the temperature range of 1.8-10 K.



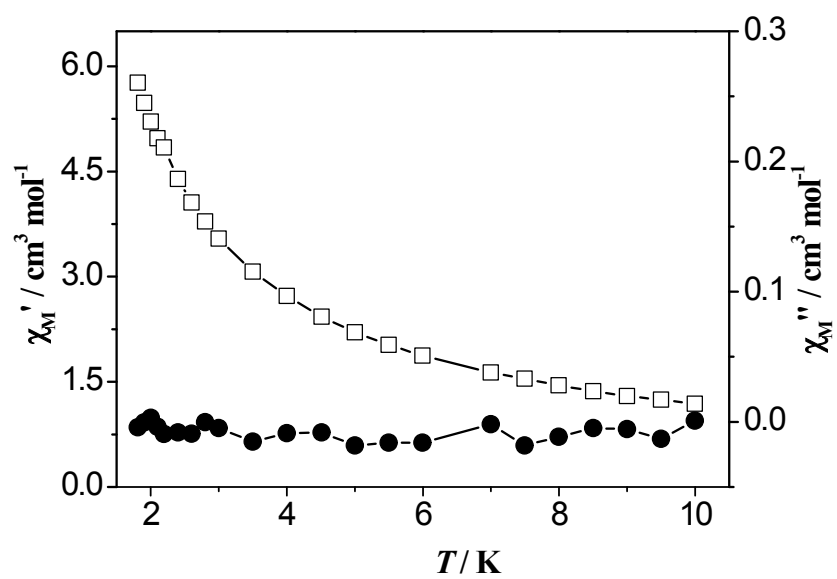

**Fig. S15** Temperature-dependent ac susceptibilities of in-phase  $\chi_M'$  and out-of-phase  $\chi_M''$  for **1L** under zero static field with a frequency of 1488 Hz in the temperature range of 1.8-10 K.

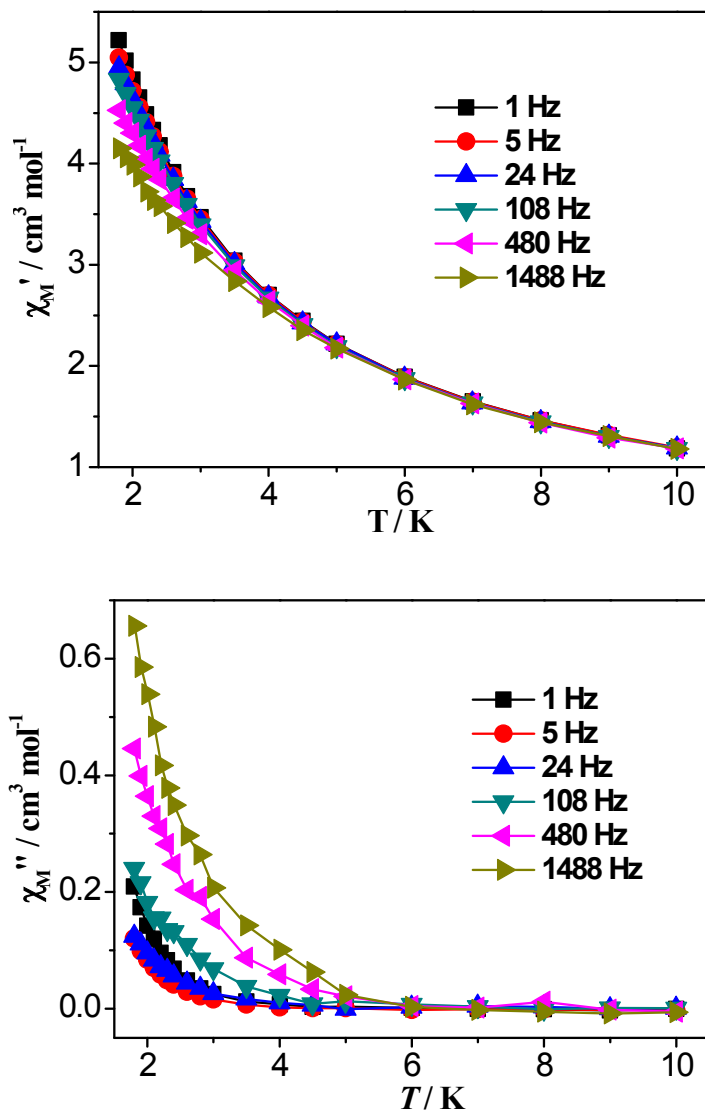

**Fig. S16** Temperature-dependent ac susceptibilities of in-phase  $\chi_M'$  (top) and out-of-phase  $\chi_M''$  (bottom) for **1** with  $H_{dc} = 1000$  Oe and  $H_{ac} = 5$  Oe.

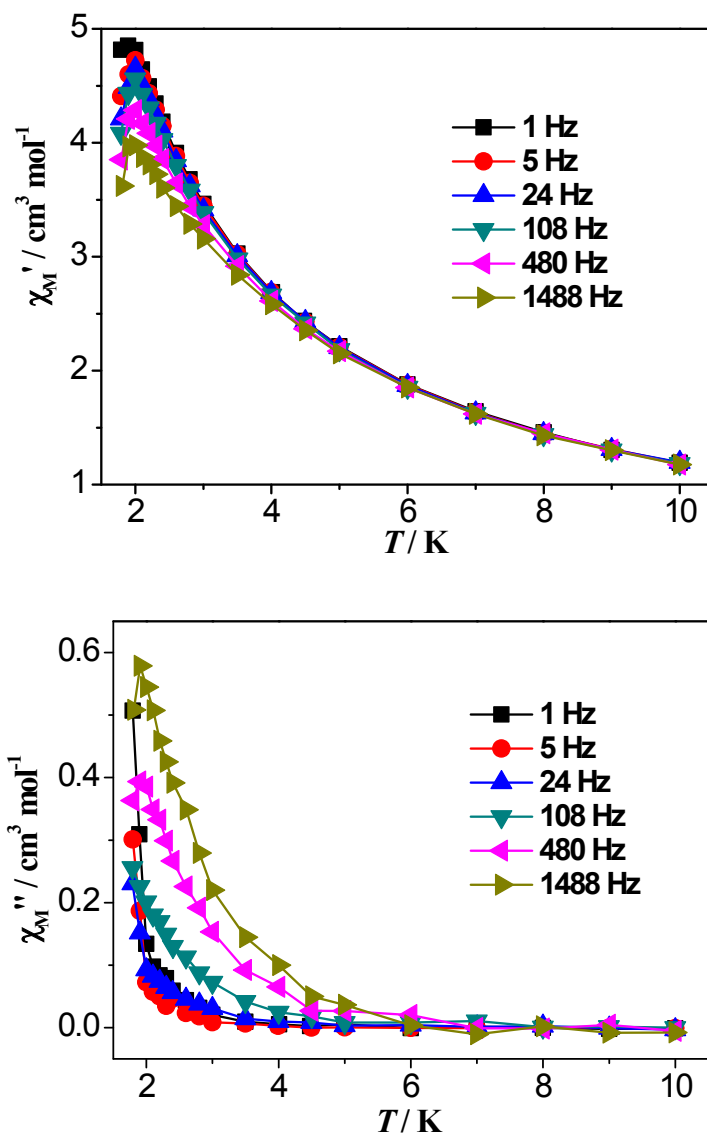

**Fig. S17** Temperature-dependent ac susceptibilities of in-phase  $\chi_M'$  (top) and out-of-phase  $\chi_M''$  (bottom) for **1L** with  $H_{\text{dc}} = 1000$  Oe and  $H_{\text{ac}} = 5$  Oe.

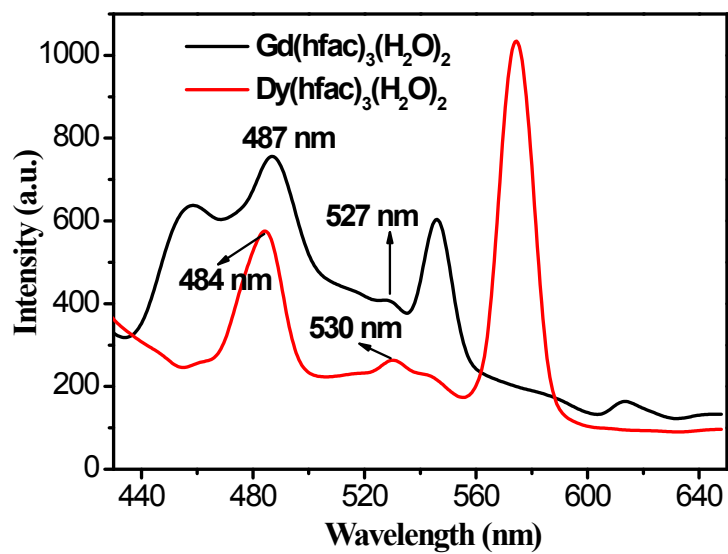

**Fig. S18** Solid-state emission spectra for  $\text{Gd}(\text{hfac})_2(\text{H}_2\text{O})_2$  and  $\text{Dy}(\text{hfac})_2(\text{H}_2\text{O})_2$  under  $\lambda_{\text{ex}} = 370$  nm at room temperature.
